# Supplementary material for: Nanocomposites of reduced graphene oxide nanosheets and conducting polymer for stretchable transparent conducting electrodes
Source: Royal Society of Chemistry journal article supplement (doi:10.1039/c2jm33949h), 2012-01-01
Supplement: c2jm33949h.pdf [file c2jm33949h.pdf]

# Nanocomposites of Reduced Graphene Oxide Nanosheets and Conducting Polymer for Stretchable Transparent Conducting Electrodes

Young Gug Seol<sup>a,±</sup>, Tran Quang Trung<sup>a,±</sup>, Ok-Ja Yoon<sup>a</sup>, Il-Yung Sohn<sup>a</sup>, and Nae-Eung Lee<sup>a,b,\*</sup>

## Supporting Information

### Supporting Figure S1

(a) After sonication

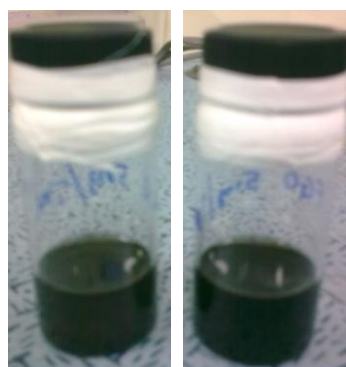

FGO

GO

(b) After 6 hrs

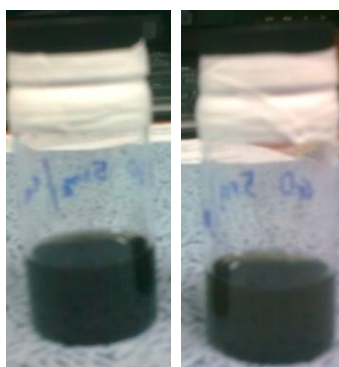

FGO

GO

(c) After 1 day

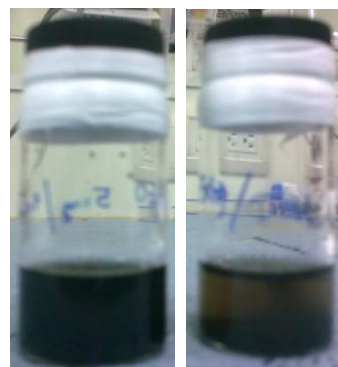

FGO

GO

(d) After 1 week

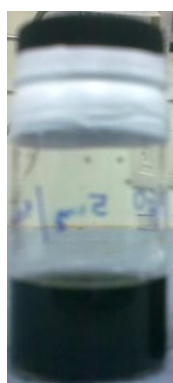

FGO

Figure S1. Comparison of dispersibility of GO and FGO nanosheets in DMF solvent. The FGO nanosheets were not agglomerated after 1 week in DMF solution but the GO nanosheets were agglomerated in within one day after preparation.

## Supporting Figure S2

(a) PEDOT:PSS

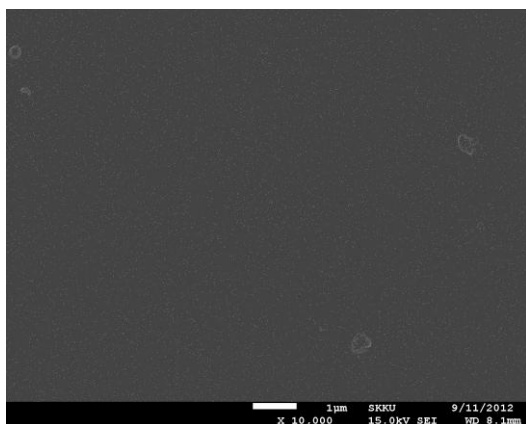

(b) PEDOT:PSS+DMSO+IPA

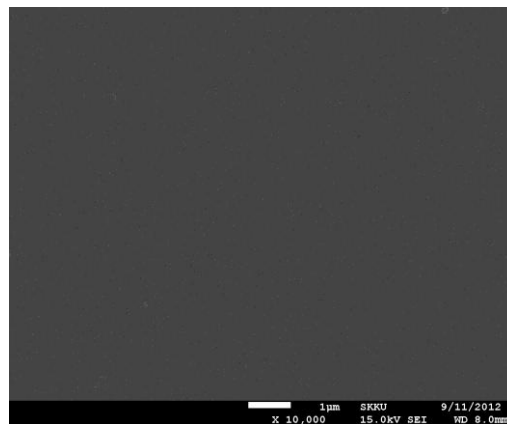

(c) GO/ PEDOT:PSS+DMSO+IPA

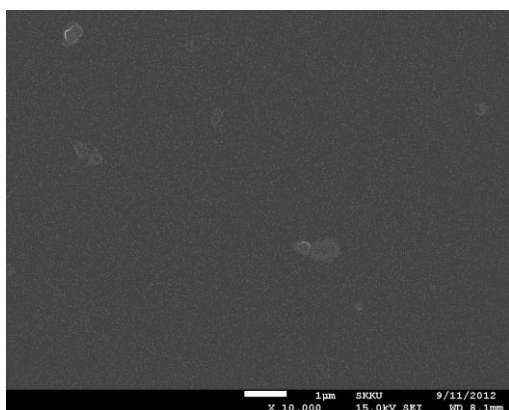

(d) FGO/ PEDOT:PSS+DMSO+IPA

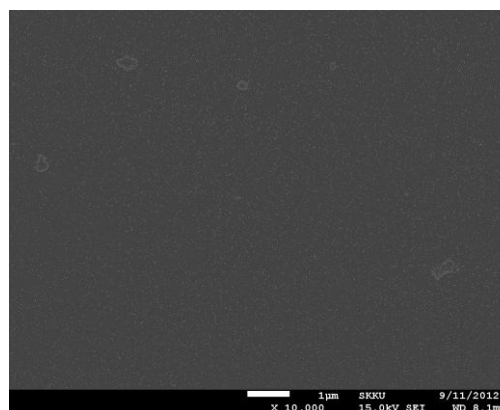

Figure S2. The FE-SEM images of four different films spin-coated with (a) PEDOT:PSS, (b) PEDOT:PSS + DMSO + IPA, (c) GO/ PEDOT:PSS + DMSO + IPA, and (d) FGO/ PEDOT:PSS + DMSO + IPA solution. The agglomeration of GO or FGO nanosheets was not clearly indentified in the FE-SEM images.

### Supporting Figure S3

(a) PEDOT:PSS

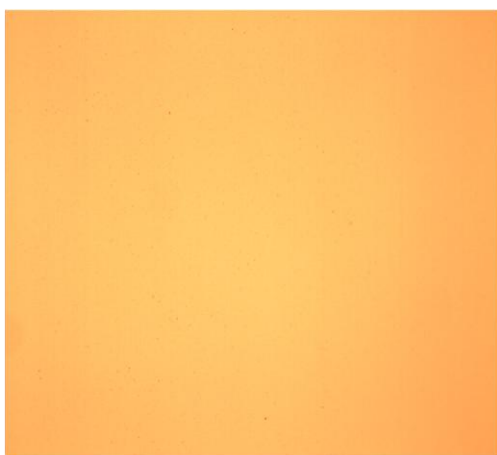

(b) PEDOT:PSS+DMSO+IPA

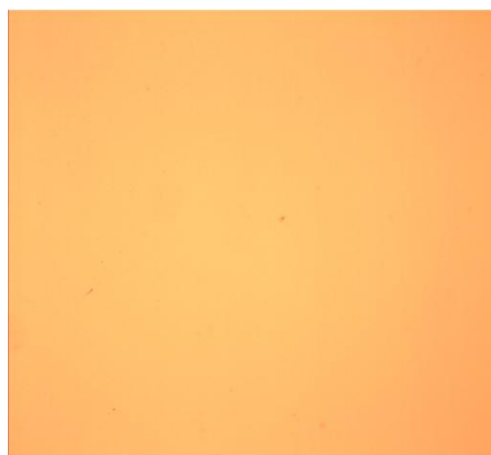

(c) GO/ PEDOT:PSS+DMSO+IPA

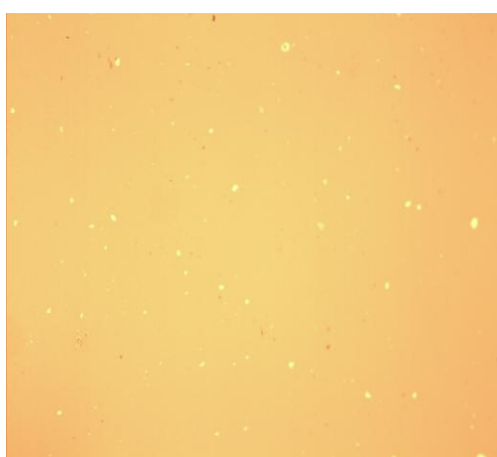

(d) FGO/ PEDOT:PSS+DMSO+IPA

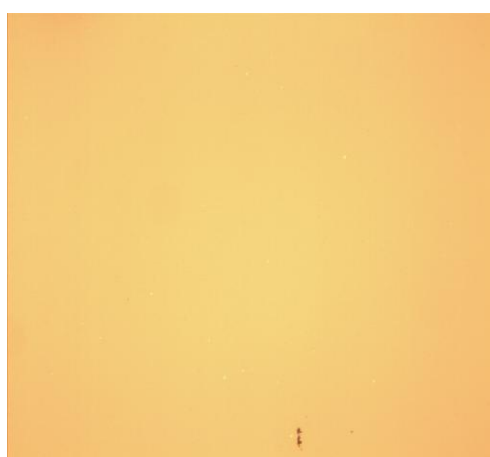

Figure S3. The optical images (500  $\mu\text{m}$  x 500  $\mu\text{m}$ ) of four kind thin films spin-coated with (a) PEDOT:PSS, (b) PEDOT:PSS + DMSO + IPA, (c) GO/ PEDOT:PSS + DMSO + IPA, and (d) FGO/ PEDOT:PSS + DMSO + IPA solution. The large particles formed by agglomeration of GO nanosheets are clearly observed in the film prepared from the GO/PEDOT:PSS + DMSO + IPS solution (Fig. S3(c)) compared to the film prepared from the FGO/ PEDOT:PSS + DMSO + IPS solution (Fig. S3 (d)).

### Supporting Figure S4

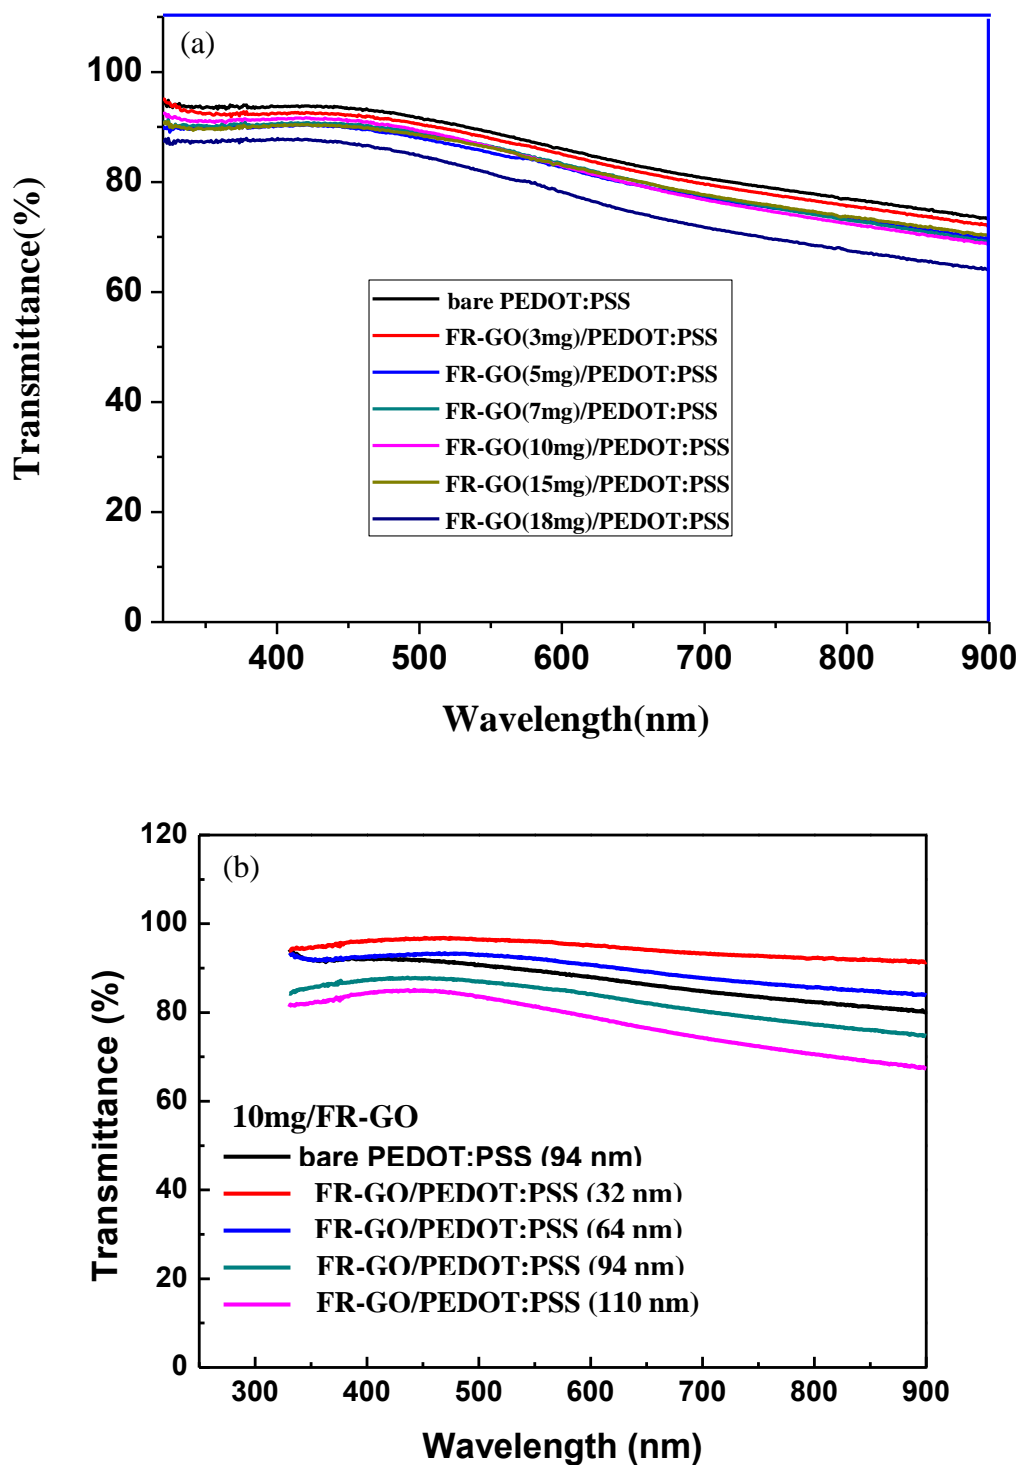

Figure S4. The optical transmittance of nanocomposites films with (a) different FR-GO concentration (mg/10 ml PEDOT:PSS solution) and (b) varying thickness at the concentration of 10 mg FR-GO/10 ml PEDOT:PSS solution.

### Supporting Figure S5

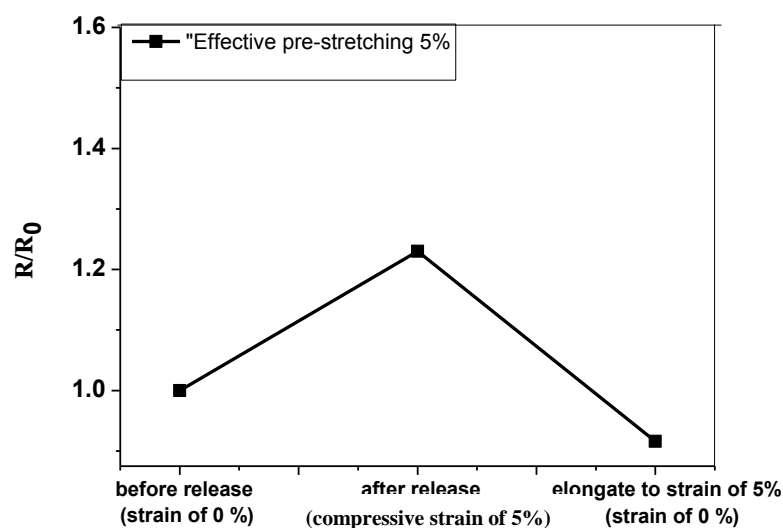

Figure S5. Resistance variation of the nanocomposite film (10 mg FR-GO/10 ml PEDOT:PSS solution) with an “effective” pre-strain of 5% (compressive) was measured at three conditions: before release of the pre-strained PDMS substrate after nanocomposite film fabrication (the nanocomposite film strain of 0%), after release of the pre-strained PDMS substrate (the nanocomposite film compressive strain of 5%), and after 5% tensile elongation of the released PDMS substrate (the nanocomposite film strain of 0%). Compressive strain in the nanocomposite film produced on the pre-strained PDMS substrate increases the electrical resistance.
